# Supplementary material for: Assessing the accuracy of multiparametric MRI to predict clinically significant prostate cancer in biopsy naïve men across racial/ethnic groups
Source: BMC Urol. 2022 Jul 18;22:107. doi: 10.1186/s12894-022-01066-9 (PMC9295380; doi:10.1186/s12894-022-01066-9)
Supplement: Supplementary file 1 — Additional file 1: De-identified patient data with corresponding legend. [file 12894_2022_1066_MOESM1_ESM.xlsx]

## Sheet: Data
Study_ID	Date_of_Biopsy	MRI_date	PIRADSv1	PIRADSv2.1	PIRADSv2.0	PIRADS_V_1_2_3	MRI_Biopsy_Difference_Days	Age_at_Biopsy	BMI	Finasteride_Use	White1_Black2_Hispanic3	PCA_FH	Married	Ever_Smoked	Current_Alcohol	LOG_2_PSA	LOG_10_PSA	PSA	MRI_Prostate_Volume	PSA Density	Abnormal_DRE	Overall_GGG	Highest_PIRADS_OVERALL	cs_Overall	Number_of_cores_systematic	Number_of_cores_targets	Number_cores_+_GG2-5_from_Systematic	Number_of_cores_+_GG2-5_in_Targets	Maximum_cancer_length_in_Systematic_cm	Maximum_cancer_length_in_Target_cm
153	2020-02-12	2020-01-21	0	0	1	2	22	64	25.3	0	2	0	1	0	1	2.77189	0.834421	6.83	56	0.121964	0	4	4	1	9	8	1	2	0.29	0.03
283	2016-10-24	2016-08-12	0	0	1	2	73	68	28.9	1	1	0	1	1	1	2.74846	0.827369	6.72	57	0.117895	0	1	3	0	13	6	0	0	0.37	0.03
27	2019-08-06	2019-07-14	0	0	1	2	23	68	30.9	1	2	1	1	0	0	2.13093	0.641474	4.38	96	0.045625	0	1	5	0	23	3	0	0	0.11	0.04
289	2017-08-09	2017-07-05	0	0	1	2	35	77	27.27	0	1	0	0	1	1	2.32193	0.69897	5	41	0.121951	0	3	4	1	7	7	1	0	0.6	0.05
155	2020-05-28	2020-01-06	0	0	1	2	143	44	25.08	0	2	1	1	0	1	2.27202	0.683947	4.83	29	0.166552	0	2	3	1	20	3	5	0	0.95	0.05
106	2019-05-31	2019-02-05	0	0	1	2	115	70	27.7	0	2	0	-9	1	1	3.01257	0.906874	8.07	79	0.102152	0	1	4	0	16	4	0	0	0	0.05
126	2018-09-24	2018-08-20	0	0	1	2	35	52	27.41	0	2	1	1	0	1	2.47768	0.745855	5.57	54.1	0.102957	0	4	4	1	13	6	3	1	0.32	0.06
301	2017-12-18	2017-11-22	0	0	1	2	26	59	27.8	0	1	1	1	0	1	2.31034	0.695482	4.96	76.4	0.0649215	0	1	3	0	15	4	0	0	0	0.06
412	2018-07-06	2018-06-13	0	0	1	2	23	62	30.99	0	1	0	1	0	0	2.09424	0.630428	4.27	35	0.122	0	3	4	1	7	2	1	1	0.91	0.07
429	2020-03-04	2020-01-27	0	0	1	2	37	58	38.3	0	3	1	1	0	0	2.0321	0.611723	4.09	33	0.123939	0	2	3	1	12	3	2	0	1.08	0.07
325	2017-06-30	2017-05-25	0	0	1	2	36	53	28.8	0	1	0	1	1	1	1.73118	0.521138	3.32	18.6	0.178495	1	1	3	0	6	3	0	0	0.11	0.08
330	2018-01-24	2018-01-14	0	0	1	2	10	61	30.54	0	1	0	1	1	-9	2.38128	0.716838	5.21	18	0.289444	0	2	3	1	10	4	2	0	0.72	0.08
53	2017-06-27	2017-01-31	0	0	1	2	147	55	28.39	0	3	0	1	1	1	2.3505	0.70757	5.1	22	0.231818	0	2	3	1	18	7	4	0	0.56	0.09
66	2019-05-08	2019-03-25	0	0	1	2	44	54	42	0	2	0	0	1	-9	3.34908	1.00817	10.19	28	0.363929	0	3	5	1	8	5	5	2	0.78	0.09
137	2018-05-16	2018-03-27	0	0	1	2	50	52	31.17	0	3	0	0	0	0	2.28392	0.687529	4.87	32	0.152188	0	3	4	1	6	1	3	0	1.19	0.09
44	2016-05-10	2016-04-19	0	0	1	2	21	62	28.86	0	2	0	0	0	0	1.59455	0.480007	3.02	49	0.0616327	0	1	4	0	32	2	0	0	0	0.09
299	2017-09-15	2017-09-07	0	0	1	2	8	48	28.87	0	1	1	1	0	1	2.22342	0.669317	4.67	36	0.129722	0	1	3	0	13	6	0	0	0	0.09
369	2015-09-14	2015-08-08	1	0	0	1	37	69	27.93	0	1	0	1	1	1	2.26303	0.681241	4.8	30	0.16	0	1	5	0	9	3	0	0	0	0.09
411	2018-11-05	2018-10-17	0	0	1	2	19	69	23.93	0	1	0	1	0	1	2.76553	0.832509	6.8	49	0.138776	0	1	5	0	6	4	0	0	0	0.09
443	2016-04-13	2016-03-03	0	0	1	2	41	56	27.98	0	3	0	1	0	1	1.58015	0.475671	2.99	67	0.0446269	0	1	4	0	7	3	0	0	0	0.09
292	2017-09-08	2017-08-14	0	0	1	2	25	70	27.02	0	1	0	1	0	1	2.26003	0.680336	4.79	20.8	0.230288	0	2	3	1	14	2	0	1	0	0.09
23	2019-11-08	2019-09-25	0	0	1	2	44	60	24.8	0	2	1	1	0	0	2.15704	0.649335	4.46	34.5	0.129275	0	3	3	1	0	5	0	3	0	0.09
56	2019-06-10	2019-04-23	0	0	1	2	48	63	37.6	0	2	1	1	-9	-9	2.0036	0.603144	4.01	41	0.0978049	0	2	4	1	10	6	2	1	0.33	0.11
361	2019-03-01	2019-01-28	0	0	1	2	32	67	25.5	0	1	1	1	1	1	2.73769	0.824126	6.67	30	0.222333	0	4	4	1	6	4	5	3	0.09	0.13
135	2019-03-05	2019-01-14	0	0	1	2	50	60	27.44	0	3	1	1	0	1	2.20477	0.663701	4.61	32	0.144063	0	2	3	1	20	8	0	2	0	0.15
264	2017-12-11	2017-12-04	0	0	1	2	7	62	24.33	0	1	0	0	1	1	2.94486	0.886491	7.7	34.6	0.222543	0	3	4	1	13	9	0	3	0.24	0.16
267	2017-12-22	2017-12-07	0	0	1	2	15	68	26.6	0	1	0	1	0	1	3.76235	1.13258	13.57	50	0.2714	0	2	4	1	13	7	4	2	0.9	0.17
142	2016-11-21	2016-10-28	0	0	1	2	24	51	30.28	0	2	0	1	0	1	2.0321	0.611723	4.09	27	0.151481	0	1	4	0	12	3	0	0	0	0.17
84	2019-12-27	2019-11-26	0	0	1	2	31	65	41.11	0	2	0	1	1	1	2.70266	0.813581	6.51	38	0.171316	0	2	4	1	12	3	4	3	0.5	0.18
346	2018-07-06	2018-06-21	0	0	1	2	15	71	25.07	0	1	1	1	1	1	2.67356	0.804821	6.38	63.7	0.100157	0	1	4	0	6	3	0	0	0.05	0.19
260	2017-12-08	2017-11-22	0	0	1	2	16	55	32.3	0	1	0	1	0	0	3.0018	0.903633	8.01	42	0.190714	0	1	4	0	6	3	0	0	0.09	0.23
130	2019-04-26	2019-03-25	0	0	1	2	32	64	26.47	0	2	0	1	1	0	1.7866	0.537819	3.45	50	0.069	1	3	3	1	19	9	8	3	0.26	0.24
437	2019-01-29	2019-01-28	0	0	1	2	1	53	25.84	0	3	0	1	0	0	2.89142	0.870404	7.42	45	0.164889	0	2	4	1	12	4	2	2	0.32	0.24
371	2019-09-13	2019-08-01	0	0	1	2	43	71	22.96	0	1	0	1	1	-9	1.74416	0.525045	3.35	35	0.0957143	0	3	4	1	14	4	3	2	0.6	0.26
136	2019-10-16	2019-10-09	0	0	1	2	7	62	33.2	0	2	1	0	0	1	3.0268	0.911158	8.15	93	0.0876344	0	3	4	1	16	5	0	1	0.16	0.27
154	2018-05-07	2018-01-11	0	0	1	2	116	51	29.13	0	2	0	-9	1	1	2.19535	0.660865	4.58	36.2	0.126519	0	2	5	1	6	6	1	0	0.84	0.27
30	2016-07-19	2016-06-17	0	0	1	2	32	56	29.3	0	2	0	0	0	1	3.06695	0.923244	8.38	16	0.52375	0	2	4	1	26	3	8	0	2.07	0.27
20	2019-09-04	2019-08-02	0	0	1	2	33	42	26.95	0	2	1	0	0	1	3.52231	1.06032	11.49	33.42	0.343806	0	3	5	1	12	5	1	2	0.33	0.3
70	2019-05-20	2019-05-04	0	0	1	2	16	55	25.1	0	2	0	0	0	-9	2.0321	0.611723	4.09	51	0.0801961	0	2	4	1	14	3	2	2	0.27	0.33
134	2018-11-13	2018-09-24	0	0	1	2	50	61	17.4	0	2	0	0	-9	-9	2.87381	0.865104	7.33	18	0.407222	0	2	4	1	14	7	2	2	0.35	0.34
415	2018-11-01	2018-10-09	0	0	1	2	23	57	33.7	0	1	1	1	0	1	2.9982	0.902547	7.99	54	0.147963	0	4	4	1	12	3	4	3	0.06	0.35
65	2017-02-03	2017-01-27	0	0	1	2	7	60	27.9	0	2	0	1	0	0	2.22033	0.668386	4.66	26.9	0.173234	0	2	4	1	6	3	0	1	0.08	0.35
139	2018-08-01	2018-06-28	0	0	1	2	34	79	28.52	0	3	0	1	1	1	2.21101	0.665581	4.63	14	0.330714	0	3	4	1	9	3	2	2	0.55	0.36
132	2017-12-18	2017-10-26	0	0	1	2	53	56	33.63	0	3	0	0	1	1	2.10098	0.632457	4.29	39	0.11	0	2	3	1	8	2	1	2	0.09	0.37
31	2018-07-23	2018-06-06	0	0	1	2	47	60	23.9	0	2	0	1	0	0	2.80941	0.845718	7.01	45	0.155778	0	2	4	1	16	8	0	1	0.11	0.38
375	2018-10-09	2018-09-18	0	0	1	2	21	77	27.41	0	1	0	1	1	1	2.23266	0.672098	4.7	74	0.0635135	0	2	4	1	16	3	0	1	0.66	0.38
320	2019-05-17	2019-04-17	0	0	1	2	30	76	25.6	0	1	0	1	0	0	2.50843	0.755112	5.69	40	0.14225	1	3	4	1	15	2	4	2	0.36	0.39
445	2017-07-17	2017-06-16	0	0	1	2	31	72	23.23	0	3	0	1	1	0	2.14731	0.646404	4.43	51	0.0868627	0	2	4	1	11	2	0	2	0.75	0.4
376	2018-04-17	2018-04-06	0	0	1	2	11	71	33.23	0	1	0	1	0	1	2.52356	0.759668	5.75	34	0.169118	0	2	4	1	12	3	0	3	0	0.42
76	2017-09-08	2017-08-18	0	0	1	2	21	65	25.82	0	2	0	0	0	0	2.39232	0.720159	5.25	34	0.154412	0	3	4	1	12	3	4	2	0.33	0.43
259	2017-12-13	2017-11-10	0	0	1	2	33	77	26.6	0	1	1	1	0	1	3.07382	0.925312	8.42	103	0.0817476	0	1	4	0	6	4	0	0	0.08	0.45
57	2018-02-22	2017-12-10	0	0	1	2	74	67	33.2	0	2	0	1	1	-9	3.41819	1.02898	10.69	34.6	0.30896	0	2	5	1	16	10	0	1	0	0.48
120	2017-01-04	2016-12-15	0	0	1	2	20	54	35.8	0	2	0	1	1	0	3.50589	1.05538	11.36	27	0.420741	0	4	4	1	7	4	5	4	0.63	0.5
413	2016-10-14	2016-10-05	0	0	1	2	9	64	27.66	0	1	0	1	0	1	2.19849	0.661813	4.59	60	0.0765	0	2	4	1	14	6	2	0	0.81	0.5
414	2019-05-24	2019-04-22	0	0	1	2	32	65	22.4	0	1	0	1	1	1	3.07382	0.925312	8.42	55	0.153091	0	3	4	1	22	6	3	7	0.27	0.52
37	2017-04-14	2017-03-16	0	0	1	2	29	63	32	0	2	0	1	1	1	2.42761	0.730782	5.38	16	0.33625	0	3	4	1	6	3	3	1	0.36	0.52
51	2018-04-20	2018-03-12	0	0	1	2	39	78	26.21	0	2	0	1	1	-9	3.21568	0.968016	9.29	30	0.309667	0	2	4	1	0	5	0	5	0	0.54
129	2019-11-15	2019-10-11	0	0	1	2	35	65	32.54	0	2	0	0	1	1	3.68706	1.10992	12.88	33	0.390303	0	3	5	1	9	5	6	4	0.09	0.56
109	2019-08-09	2019-07-16	0	0	1	2	24	59	28.7	0	2	1	0	1	1	2.28392	0.687529	4.87	89	0.0547191	0	2	3	1	12	3	0	2	0	0.57
68	2017-04-10	2017-03-16	0	0	1	2	25	70	31.24	0	2	0	1	1	0	2.83592	0.853698	7.14	86	0.0830233	0	4	5	1	15	3	0	1	0	0.59
156	2017-04-10	2017-03-16	0	0	1	2	25	70	31.24	0	2	0	1	1	1	2.83592	0.853698	7.14	86	0.0830233	0	4	5	1	15	3	0	3	0	0.59
334	2018-05-14	2018-04-05	0	0	1	2	39	68	26.4	0	1	1	1	1	-9	3.37851	1.01703	10.4	49.6	0.209677	0	2	4	1	10	4	1	4	0.2	0.6
117	2019-12-19	2019-11-08	0	0	1	2	41	67	29.62	0	2	0	1	0	0	2.854	0.859138	7.23	48	0.150625	0	3	4	1	24	9	3	6	0.42	0.6
10	2019-10-09	2019-09-21	0	0	1	2	18	62	21.7	0	2	0	1	0	-9	2.54102	0.764923	5.82	28.5	0.204211	0	2	4	1	13	8	1	3	0.095	0.64
4	2019-07-09	2019-06-03	0	0	1	2	36	74	25.23	1	3	0	1	0	0	2.39506	0.720986	5.26	92	0.0571739	0	2	4	1	19	6	1	2	0.22	0.64
272	2017-11-27	2017-10-16	0	0	1	2	42	71	25	0	1	0	0	0	1	2.27202	0.683947	4.83	89	0.0542697	0	2	4	1	15	3	7	1	1.28	0.64
145	2019-04-15	2019-04-09	0	0	1	2	6	58	28.2	0	2	0	1	1	0	2.926	0.880814	7.6	37	0.205405	0	3	4	1	7	3	2	1	1.2	0.65
266	2017-12-18	2017-12-04	0	0	1	2	14	64	26.5	0	1	0	1	0	1	2.37573	0.715167	5.19	59.4	0.0873737	0	3	4	1	14	8	5	6	1.4	0.65
372	2019-03-01	2019-01-11	0	0	1	2	49	67	28.65	0	1	1	1	0	1	2.80323	0.843855	6.98	26	0.268462	0	3	4	1	6	2	2	2	0.8	0.66
103	2019-04-15	2019-03-06	0	0	1	2	40	61	44.3	0	2	0	0	0	1	3.88655	1.16997	14.79	62	0.238548	0	5	5	1	11	4	6	2	0.72	0.68
50	2019-08-09	2019-07-10	0	0	1	2	30	63	32.92	0	2	1	1	0	0	3.17951	0.957128	9.06	33.6	0.269643	0	3	4	1	13	10	6	9	0.59	0.7
350	2019-10-07	2019-08-17	0	0	1	2	51	66	24.55	0	1	0	1	0	1	2.48285	0.747412	5.59	42.4	0.13184	0	3	4	1	22	3	3	2	0.68	0.7
77	2016-11-29	2016-09-14	0	0	1	2	76	70	32.41	0	2	1	1	1	1	2.45418	0.738781	5.48	26	0.210769	0	1	3	0	12	5	0	0	0.09	0.72
147	2019-12-06	2019-09-30	0	0	1	2	67	64	26.58	0	2	0	0	0	1	2.80941	0.845718	7.01	51	0.137451	0	2	4	1	12	7	0	2	0.11	0.73
81	2017-12-18	2017-11-17	0	0	1	2	31	60	31.12	0	3	1	1	0	0	2.22651	0.670246	4.68	62	0.0754839	0	1	4	0	9	2	0	0	0.16	0.75
6	2017-03-01	2017-02-15	0	0	1	2	14	56	30.34	0	2	1	1	0	1	2.91073	0.876218	7.52	24	0.313333	0	4	4	1	7	4	2	3	0.45	0.75
163	2017-03-01	2017-02-15	0	0	1	2	14	56	30.34	0	2	1	1	0	1	2.91073	0.876218	7.52	24	0.313333	0	4	4	1	7	4	3	3	0.45	0.75
433	2020-09-08	2020-08-27	0	1	0	3	12	56	31.4	0	3	0	-9	0	1	2.22959	0.671173	4.69	34	0.137941	0	2	4	1	14	3	4	3	0.87	0.75
349	2018-08-10	2018-05-18	0	0	1	2	84	66	34.44	0	1	0	1	1	1	3.48285	1.04844	11.18	41.5	0.269398	0	3	4	1	8	4	3	3	0.59	0.77
112	2019-11-12	2019-11-02	0	0	1	2	10	51	28.75	0	2	0	1	1	1	2.33056	0.701568	5.03	17.6	0.285795	1	3	4	1	17	10	7	3	0.84	0.77
55	2019-10-07	2019-09-01	0	0	1	2	36	74	31.25	0	2	0	0	1	1	2.24489	0.675778	4.74	31.2	0.151923	0	4	4	1	13	4	2	3	0.58	0.78
373	2019-09-23	2019-07-30	0	0	1	2	55	68	35.15	0	1	1	1	0	1	2.85997	0.860937	7.26	40	0.1815	0	5	4	1	10	10	7	6	1.52	0.78
365	2019-09-05	2019-08-21	0	0	1	2	15	46	27.4	0	1	1	0	1	1	2.41143	0.725912	5.32	20	0.266	0	2	4	1	23	5	3	3	0.52	0.81
35	2018-08-20	2018-06-02	0	0	1	2	79	71	23.5	0	3	0	1	0	0	0.910733	0.274158	1.88	29	0.0648276	1	3	5	1	12	4	5	3	0.88	0.81
263	2017-12-15	2017-11-22	0	0	1	2	23	67	25.1	0	1	0	1	0	0	2.80323	0.843855	6.98	52	0.134231	0	1	4	0	0	7	0	0	0	0.81
114	2019-04-18	2019-03-21	0	0	1	2	28	63	26.54	0	3	1	0	0	1	1.9486	0.586587	3.86	50	0.0772	0	2	4	1	12	5	0	1	0	0.81
293	2017-09-11	2017-08-09	0	0	1	2	33	60	35.18	0	1	0	1	1	1	2.22033	0.668386	4.66	60	0.0776667	0	2	4	1	17	9	5	7	0.75	0.83
148	2019-01-18	2018-12-24	0	0	1	2	25	60	26.6	0	2	0	0	0	1	2.81147	0.846337	7.02	40	0.1755	0	3	4	1	13	2	1	1	0.24	0.84
64	2016-07-11	2016-06-24	0	0	1	2	17	72	23.7	0	2	1	1	0	1	1.58976	0.478566	3.01	35	0.086	0	2	5	1	16	3	2	2	0.81	0.84
36	2019-01-17	2018-03-09	0	0	1	2	314	67	29.5	0	2	0	0	1	1	2.848	0.857332	7.2	33	0.218182	0	3	4	1	12	11	2	6	1.26	0.84
115	2016-04-01	2016-01-30	0	0	1	2	62	66	31.19	0	2	0	1	1	1	2.91073	0.876218	7.52	110	0.0683636	0	4	4	1	12	8	1	5	0.07	0.86
262	2017-12-15	2017-11-24	0	0	1	2	21	46	28.7	0	1	1	1	0	1	1.70487	0.513218	3.26	32.7	0.0996942	0	2	3	1	12	7	0	3	0.62	0.87
282	2017-10-25	2017-09-20	0	0	1	2	35	50	28.5	0	1	0	1	1	1	2.01792	0.607455	4.05	32	0.126562	0	3	4	1	10	4	3	2	1	0.87
16	2019-05-07	2019-03-07	0	0	1	2	61	69	38.1	0	2	0	1	1	1	3.31759	0.998695	9.97	33	0.302121	0	4	5	1	23	3	2	3	0.02	0.88
8	2019-04-29	2019-04-18	0	0	1	2	11	57	50.2	0	2	0	1	0	1	2.85599	0.859739	7.24	25	0.2896	0	2	4	1	20	7	8	3	0.56	0.88
419	2018-10-26	2018-10-19	0	0	1	2	7	67	28.98	0	1	0	1	1	0	2.75702	0.829947	6.76	27	0.25037	1	3	5	1	18	4	5	2	1.15	0.9
296	2017-08-25	2017-08-03	0	0	1	2	22	66	22.1	0	1	0	0	1	1	2.4957	0.751279	5.64	57	0.0989474	0	1	5	0	19	6	0	0	0.07	0.93
380	2019-12-04	2019-11-20	0	0	1	2	14	49	29.13	0	1	0	1	0	1	2.15704	0.649335	4.46	20	0.223	0	3	4	1	8	4	2	3	0.48	0.93
343	2019-09-27	2019-09-15	0	0	1	2	12	50	23.1	0	1	0	1	0	1	2.16993	0.653213	4.5	24	0.1875	0	2	4	1	13	10	9	7	0.85	0.93
321	2018-10-25	2018-10-11	0	0	1	2	14	50	32.71	0	1	1	1	0	1	2.22342	0.669317	4.67	31	0.150645	0	3	5	1	15	3	6	3	1.5	0.96
52	2019-09-16	2019-06-26	0	0	1	2	82	69	24.59	0	3	0	0	1	1	2.11103	0.635484	4.32	45	0.096	0	3	3	1	26	3	1	2	0.08	0.99
438	2019-09-16	2019-06-26	0	0	1	2	82	69	23.49	0	3	0	0	1	1	2.11103	0.635484	4.32	45	0.096	0	3	3	1	26	3	1	2	0.08	0.99
336	2019-03-11	2019-01-31	0	0	1	2	39	61	45.6	0	1	0	1	1	1	2.06005	0.620136	4.17	85	0.0490588	0	1	3	0	20	10	0	0	0.57	0.99
288	2017-08-04	2017-07-12	0	0	1	2	23	60	29.3	0	1	0	1	1	1	2.54597	0.766413	5.84	26.5	0.220377	0	3	4	1	6	6	1	3	0.28	1
290	2017-10-04	2017-07-11	0	0	1	2	85	73	22.51	0	1	0	0	1	0	2.29866	0.691965	4.92	51	0.0964706	0	2	4	1	9	7	0	3	0.3	1.04
331	2018-11-15	2018-10-17	0	0	1	2	29	65	27.8	0	1	0	1	0	-9	2.32769	0.700704	5.02	32	0.156875	1	3	4	1	12	3	4	3	1.4	1.04
362	2019-06-13	2019-05-23	0	0	1	2	21	63	37.7	0	1	0	0	1	1	2.04963	0.617	4.14	43.9	0.0943052	0	3	4	1	22	7	5	5	0.81	1.05
41	2017-02-01	2017-01-17	0	0	1	2	15	56	28.37	0	2	0	0	0	0	2.28096	0.686636	4.86	23.5	0.206809	0	2	4	1	6	4	0	2	0.06	1.08
327	2019-11-21	2019-09-13	0	0	1	2	69	56	22.4	0	1	0	1	0	1	1.95233	0.587711	3.87	40	0.09675	1	2	4	1	16	9	3	6	0.5	1.1
75	2018-08-17	2018-07-16	0	0	1	2	32	60	29.69	0	2	0	0	0	0	2.96162	0.891537	7.79	60	0.129833	1	5	4	1	13	6	6	4	1.44	1.1
122	2019-05-17	2019-04-25	0	0	1	2	22	60	24.9	0	2	0	0	1	1	2.23266	0.672098	4.7	40	0.1175	0	2	4	1	17	2	0	3	0	1.1
46	2017-08-11	2017-07-14	0	0	1	2	28	72	25.8	0	3	0	0	1	0	2.8339	0.85309	7.13	37	0.192703	0	2	5	1	6	4	2	2	0.88	1.12
273	2017-11-27	2017-10-25	0	0	1	2	33	68	26.8	0	1	1	0	0	1	1.8953	0.570543	3.72	58	0.0641379	0	1	3	0	12	5	0	0	0.08	1.13
13	2016-07-14	2016-07-11	0	0	1	2	3	58	27.3	0	3	0	1	0	0	2.76553	0.832509	6.8	115	0.0591304	1	2	4	1	15	3	3	3	0.66	1.13
162	2017-02-21	2017-01-07	0	0	1	2	45	61	37.13	0	2	0	1	1	1	2.99639	0.902003	7.98	36	0.221667	0	4	3	1	14	5	4	2	0.05	1.14
420	2020-09-18	2020-09-05	0	1	0	3	13	66	35.87	0	3	0	1	1	1	2.61117	0.786041	6.11	24.8	0.246371	0	3	5	1	7	3	3	3	1.28	1.16
101	2017-10-16	2017-09-29	0	0	1	2	17	67	23.6	0	3	0	1	1	1	1.89918	0.571709	3.73	26	0.143462	0	2	4	1	16	3	3	3	0.99	1.17
284	2017-10-20	2017-08-21	0	0	1	2	60	73	32.49	1	1	0	1	1	1	3.40054	1.02366	10.56	34	0.310588	0	2	3	1	7	5	1	4	0.68	1.24
12	2018-01-23	2017-12-24	0	0	1	2	30	78	24.48	0	3	0	1	0	1	3.20163	0.963788	9.2	45	0.204444	0	3	3	1	14	2	11	2	1.24	1.28
367	2020-12-20	2019-11-25	0	0	1	2	391	52	26.14	0	1	0	1	1	0	3.19061	0.960471	9.13	30	0.304333	1	3	5	1	5	4	3	4	0.32	1.3
42	2017-03-06	2017-02-20	0	0	1	2	14	63	29.6	0	2	0	1	1	1	2.57773	0.775974	5.97	27	0.221111	0	5	5	1	8	3	4	3	1.53	1.3
151	2019-12-04	2019-09-21	0	0	1	2	74	70	38	0	2	0	0	0	0	2.29278	0.690196	4.9	24.6	0.199187	0	3	5	1	7	4	6	4	0.9	1.5
286	2017-09-29	2017-09-08	0	0	1	2	21	74	31.3	0	1	0	1	1	0	3.37434	1.01578	10.37	58	0.178793	1	5	5	1	6	2	3	2	1.36	1.62
368	2018-01-05	2017-12-04	0	0	1	2	32	61	40.3	0	1	0	0	0	1	2.47249	0.744293	5.55	53.8	0.10316	0	3	5	1	6	4	2	2	1.36	1.62
416	2018-10-17	2018-08-16	0	0	1	2	62	69	25.1	0	1	0	1	1	1	2.16993	0.653213	4.5	66	0.0681818	0	3	4	1	6	7	0	5	0.42	1.65
428	2020-12-11	2020-11-21	0	1	0	3	20	43	22.15	0	3	0	1	1	1	3.8885	1.17056	14.81	22.3	0.664126	0	3	4	1	6	2	3	2	1.62	1.75
366	2018-02-13	2018-02-09	0	0	1	2	4	80	34.6	0	1	0	1	0	0	2.32769	0.700704	5.02	71	0.0707042	1	3	5	1	13	3	4	0	1.61	1.84
341	2018-06-21	2018-06-11	0	0	1	2	10	64	23.88	0	1	0	1	0	1	2.19535	0.660865	4.58	33	0.138788	0	1	3	0	21	3	0	0	0.02	0
69	2017-07-14	2017-06-15	0	0	1	2	29	60	21.86	0	2	0	1	0	0	3.29131	0.990783	9.79	38	0.257632	0	1	4	0	7	2	0	0	0.03	0
422	2020-02-05	2020-01-18	0	0	1	2	18	58	37.15	0	3	0	1	0	1	2.05658	0.619093	4.16	46	0.0904348	0	1	4	0	10	10	0	0	0.03	0
60	2018-12-14	2018-11-20	0	0	1	2	24	69	24.4	0	2	0	1	1	0	2.35614	0.70927	5.12	52.7	0.0971537	0	1	3	0	13	3	0	0	0.04	0
152	2018-07-02	2018-06-05	0	0	1	2	27	69	23.38	0	1	0	1	0	1	2.09085	0.62941	4.26	26	0.163846	0	1	4	0	12	6	0	0	0.05	0
98	2017-03-16	2017-01-30	0	0	1	2	45	53	26	0	2	0	1	0	0	1.52607	0.459392	2.88	26	0.110769	1	3	4	1	12	1	8	0	0.06	0
105	2019-11-15	2019-10-12	0	0	1	2	34	58	28.2	0	3	0	-9	0	0	3.26153	0.981819	9.59	28	0.3425	0	1	4	0	7	2	0	0	0.07	0
125	2019-05-07	2018-01-30	0	0	1	2	462	58	30.24	0	2	0	1	1	1	3.59574	1.08243	12.09	69	0.175217	0	2	1	1	12	0	1	0	0.07	0
351	2017-11-21	2017-11-07	0	0	1	2	14	58	29.27	0	1	1	1	1	1	2.90304	0.873902	7.48	31	0.24129	0	1	1	0	18	0	0	0	0.08	0
34	2016-09-09	2016-08-05	0	0	1	2	35	53	25.9	0	2	1	0	0	1	2.63923	0.794488	6.23	20	0.3115	0	1	1	0	12	0	0	0	0.08	0
94	2015-05-29	2014-12-14	1	0	0	1	166	77	26.8	0	2	0	1	1	1	2.64847	0.797268	6.27	96.7	0.0648397	0	1	1	0	13	0	0	0	0.08	0
310	2017-11-21	2017-11-07	0	0	1	2	14	58	28.12	0	1	1	1	1	1	2.90304	0.873902	7.48	31	0.24129	0	1	1	0	16	0	0	0	0.08	0
312	2017-08-04	2017-07-17	0	0	1	2	18	66	21.62	0	1	0	1	0	1	2.98914	0.899821	7.94	36	0.220556	0	1	1	0	13	0	0	0	0.08	0
161	2018-02-16	2018-01-10	0	0	1	2	37	47	30.6	0	2	0	0	0	1	3.34341	1.00647	10.15	30	0.338333	0	2	4	1	13	6	1	0	0.09	0
427	2020-09-15	2020-08-30	0	1	0	3	16	52	39.47	0	3	1	0	0	1	2.02503	0.609594	4.07	83.8	0.048568	0	1	4	0	13	4	0	0	0.09	0
38	2018-02-16	2018-01-10	0	0	1	2	37	47	30.6	0	2	0	0	0	1	3.34341	1.00647	10.15	30	0.338333	0	2	4	1	13	6	1	0	0.1	0
358	2019-02-18	2019-01-22	0	0	1	2	27	57	27.06	0	1	0	0	0	1	2	0.60206	4	54	0.0740741	0	1	3	0	12	7	0	0	0.11	0
91	2019-11-07	2019-10-12	0	0	1	2	26	54	32.5	0	2	0	-9	-9	-9	3.43296	1.03342	10.8	97	0.11134	0	1	4	0	19	3	0	0	0.13	0
90	2019-06-26	2019-06-06	0	0	1	2	20	61	40.89	0	2	0	0	0	0	2.0321	0.611723	4.09	39.1	0.104604	0	2	4	1	12	6	1	0	0.14	0
347	2016-06-08	2016-04-25	0	0	1	2	44	64	23.68	1	1	1	1	0	1	2.20163	0.662758	4.6	31	0.148387	0	1	1	0	13	0	0	0	0.14	0
444	2017-03-17	2017-03-05	0	0	1	2	12	60	28.08	0	3	0	1	0	0	2.42223	0.729165	5.36	34	0.157647	0	2	1	1	16	0	2	0	0.15	0
89	2016-12-15	2016-11-18	0	0	1	2	27	65	28.91	0	2	0	1	1	0	2.86196	0.861534	7.27	73	0.099589	0	1	5	0	11	0	0	0	0.15	0
123	2019-02-21	2019-01-30	0	0	1	2	22	43	41.12	0	2	0	0	1	1	3.11437	0.937518	8.66	40	0.2165	0	1	4	0	22	3	0	0	0.17	0
131	2018-09-11	2018-08-17	0	0	1	2	25	75	29.15	0	2	0	0	0	0	2.03914	0.613842	4.11	70.4	0.0583807	0	1	4	0	17	3	0	0	0.19	0
363	2019-11-04	2019-10-08	0	0	1	2	27	67	23.57	0	1	0	1	1	0	2.24184	0.674861	4.73	34	0.139118	0	1	3	0	12	4	0	0	0.19	0
128	2018-12-20	2018-11-20	0	0	1	2	30	70	24.2	0	2	1	1	1	0	2.52105	0.758912	5.74	41	0.14	0	1	4	0	16	4	0	0	0.21	0
322	2018-12-19	2018-10-16	0	0	1	2	64	75	24.3	0	1	0	1	0	1	2.41414	0.726727	5.33	37.8	0.141005	0	2	4	1	16	0	5	0	0.25	0
28	2019-08-15	2019-07-02	0	0	1	2	44	66	33.8	0	2	0	1	0	1	3.71589	1.1186	13.14	20.6	0.637864	1	2	5	1	19	9	2	0	0.27	0
446	2017-10-12	2017-09-18	0	0	1	2	24	69	27.33	0	3	0	1	1	1	2.73118	0.822168	6.64	158	0.0420253	0	2	4	1	12	3	1	0	0.29	0
124	2018-03-14	2017-10-04	0	0	1	2	161	55	27.83	0	2	0	0	1	1	2.29572	0.691081	4.91	42	0.116905	0	2	3	1	6	7	2	0	0.38	0
83	2017-07-17	2017-06-16	0	0	1	2	31	72	19.03	0	3	0	1	1	0	2.14731	0.646404	4.43	51	0.0868627	0	2	1	1	13	0	2	0	0.4	0
311	2017-10-20	2017-09-08	0	0	1	2	42	62	29.01	0	1	0	1	0	1	2.44095	0.7348	5.43	89	0.0610112	0	1	1	0	19	0	0	0	0.5	0
340	2018-08-20	2018-07-26	0	0	1	2	25	55	29.68	0	1	0	1	0	1	3.09592	0.931966	8.55	71	0.120423	0	1	5	0	12	6	0	0	0.65	0
335	2019-01-18	2018-11-10	0	0	1	2	69	64	30.74	0	1	1	1	0	1	2.68257	0.807535	6.42	30	0.214	0	3	4	1	18	0	5	0	0.81	0
87	2019-05-14	2019-04-04	0	0	1	2	40	51	38.74	0	2	0	1	0	1	2.84398	0.856124	7.18	32	0.224375	0	3	1	1	23	0	3	0	0.84	0
370	2017-06-28	2017-05-15	0	0	1	2	44	62	30.24	1	1	0	0	1	1	1.75702	0.528917	3.38	15.9	0.212579	1	3	4	1	14	0	8	0	0.87	0
374	2017-10-10	2017-09-19	0	0	1	2	21	56	28.6	0	1	1	1	0	1	2.28688	0.68842	4.88	23	0.212174	0	2	1	1	15	0	8	0	1.04	0
329	2018-10-11	2018-09-26	0	0	1	2	15	70	23.2	0	1	0	1	0	1	2.13093	0.641474	4.38	46	0.0952174	0	2	4	1	16	0	4	0	1.2	0
379	2016-02-24	2016-02-17	0	0	1	2	7	75	24.6	0	1	1	1	0	1	1.73985	0.523746	3.34	76	0.0439474	0	1	1	0	12	0	0	0	1.25	0
108	2017-07-12	2017-03-24	0	0	1	2	110	60	35.78	0	3	0	1	1	-9	2.62527	0.790285	6.17	20.3	0.303941	0	3	1	1	14	0	5	0	1.39	0
383	2018-10-11	2018-10-05	0	0	1	2	6	68	29.35	0	2	0	1	1	-9	2.774	0.835056	6.84	47.5	0.144	0	1	4	0	-9	-9	-9	-9	0	0
384	2018-11-01	2018-10-26	0	0	1	2	6	64	30.13	0	2	0	0	0	-9	2.97636	0.895975	7.87	57.9	0.135924	0	4	5	1	-9	-9	-9	-9	0	0
386	2019-05-09	2019-05-02	0	0	1	2	7	49	28.07	0	2	1	0	0	-9	3.33199	1.00303	10.07	40.3	0.249876	0	1	3	0	-9	-9	-9	-9	0	0
388	2019-07-15	2019-07-02	0	0	1	2	13	50	23.09	0	1	1	1	0	-9	3.39232	1.02119	10.5	17.8	0.589888	0	3	4	1	-9	-9	-9	-9	0	0
389	2019-07-29	2019-07-23	0	0	1	2	6	60	22.65	0	2	0	1	0	-9	2.3505	0.70757	5.1	28.7	0.1777	0	4	4	1	-9	-9	-9	-9	0	0
390	2019-09-09	2019-09-03	0	0	1	2	6	69	27.57	0	2	0	0	1	-9	1.926	0.579784	3.8	57.5	0.066087	0	1	4	0	-9	-9	-9	-9	0	0
391	2020-01-06	2019-12-30	0	0	1	2	7	59	31.19	0	2	0	1	0	-9	2.26303	0.681241	4.8	43.9	0.109339	0	0	4	0	-9	-9	-9	-9	0	0
392	2020-09-30	2020-09-02	0	1	0	3	28	58	33.64	0	2	0	1	1	-9	2.30743	0.694605	4.95	38.1	0.129921	0	0	4	0	-9	-9	-9	-9	0	0
393	2021-01-06	2020-12-14	0	1	0	3	23	68	29.76	0	2	0	1	0	-9	2.20789	0.664642	4.62	48.4	0.0954545	0	0	3	0	-9	-9	-9	-9	0	0
394	2021-01-29	2020-12-11	0	1	0	3	49	55	29.65	0	2	0	1	0	-9	2.59455	0.781037	6.04	73.2	0.0825137	0	1	4	0	-9	-9	-9	-9	0	0
395	2021-02-03	2021-01-28	0	1	0	3	6	61	27.95	0	2	0	1	0	-9	2.64847	0.797268	6.27	102.6	0.0611111	0	0	5	0	-9	-9	-9	-9	0	0
2	2016-12-02	2016-11-21	0	0	1	2	11	64	23.3	0	2	0	0	-9	-9	3.904	1.17522	14.97	41	0.365122	0	0	5	0	12	5	0	0	0	0
3	2019-05-31	2019-05-05	0	0	1	2	26	54	24.4	0	2	0	0	0	-9	3.64155	1.09621	12.48	165	0.0756364	0	0	3	0	13	6	0	0	0	0
7	2017-01-18	2016-12-16	0	0	1	2	33	63	25	0	3	0	0	1	1	-1.8365	-0.552842	0.28	17.9	0.0156425	0	0	3	0	16	7	0	0	0	0
19	2019-12-12	2019-10-04	0	0	1	2	69	63	25.1	0	3	0	1	-9	-9	2.3505	0.70757	5.1	97	0.0525773	0	0	4	0	17	9	0	0	0	0
26	2017-01-09	2016-12-17	0	0	1	2	23	58	26	0	3	0	1	1	0	2.19535	0.660865	4.58	39	0.117436	0	0	3	0	6	3	0	0	0	0
39	2017-06-09	2017-05-04	0	0	1	2	36	65	25.86	0	2	0	0	0	1	2.81352	0.846955	7.03	38.6	0.182124	0	0	3	0	17	3	0	0	0	0
43	2019-03-08	2019-02-01	0	0	1	2	35	53	25.8	0	3	0	-9	0	0	2.51854	0.758155	5.73	38.8	0.14768	0	0	3	0	13	5	0	0	0	0
45	2014-05-13	2014-04-26	1	0	0	1	17	71	30.28	0	2	0	1	0	-9	2.68032	0.806858	6.41	105	0.0610476	0	0	1	0	28	0	0	0	0	0
47	2018-10-18	2018-08-29	0	0	1	2	50	65	-9	0	3	0	1	0	0	2.72683	0.820858	6.62	88	0.0752273	0	0	3	0	14	0	0	0	0	0
48	2018-10-10	2018-09-29	0	0	1	2	11	59	23.5	0	2	0	1	-9	-9	3.69933	1.11361	12.99	110	0.118091	0	0	3	0	15	3	0	0	0	0
54	2019-05-28	2019-05-02	0	0	1	2	26	52	39.9	0	3	0	1	0	0	3.11437	0.937518	8.66	45	0.192444	0	0	4	0	20	13	0	0	0	0
59	2018-07-20	2018-04-30	0	0	1	2	81	61	22.8	0	2	0	0	0	0	3.83996	1.15594	14.32	40	0.358	0	0	5	0	6	4	0	0	0	0
61	2019-06-27	2019-06-01	0	0	1	2	26	53	21.99	0	2	1	1	0	1	0.432959	0.130334	1.35	49	0.027551	0	0	3	0	32	3	0	0	0	0
67	2017-07-28	2017-06-03	0	0	1	2	55	62	26.3	0	3	0	1	1	-9	1.9222	0.578639	3.79	88	0.0430682	0	0	4	0	10	3	0	0	0	0
71	2019-09-20	2019-08-24	0	0	1	2	27	56	40.89	0	2	0	0	1	1	2.41143	0.725912	5.32	44	0.120909	0	0	4	0	7	3	0	0	0	0
74	2019-04-12	2019-01-25	0	0	1	2	77	46	35.87	0	2	0	0	0	1	1.12433	0.338456	2.18	52	0.0419231	0	0	3	0	12	3	0	0	0	0
79	2017-05-31	2017-04-26	0	0	1	2	35	69	30.3	0	2	1	1	0	0	2.52105	0.758912	5.74	114.7	0.0500436	0	0	3	0	11	0	0	0	0	0
80	2018-09-25	2018-08-17	0	0	1	2	39	59	31.64	0	3	0	1	1	0	2.01078	0.605305	4.03	74	0.0544595	0	0	4	0	17	7	0	0	0	0
95	2018-04-04	2018-02-09	0	0	1	2	54	71	26.9	0	3	0	1	0	1	2.15381	0.64836	4.45	79	0.0563291	0	0	5	0	0	6	0	0	0	0
97	2018-08-02	2018-07-12	0	0	1	2	21	66	31.32	0	3	0	0	0	1	2.48543	0.748188	5.6	32.5	0.172308	0	0	3	0	16	2	0	0	0	0
99	2019-05-02	2019-04-16	0	0	1	2	16	21	26.04	0	3	0	-9	0	-9	0.505891	0.152288	1.42	95.6	0.0148536	1	0	1	0	12	2	0	0	0	0
100	2017-06-30	2017-05-17	0	0	1	2	44	69	23.9	1	3	0	1	1	0	3.99277	1.20194	15.92	38.7	0.41137	0	0	4	0	6	3	0	0	0	0
107	2019-09-16	2019-07-24	0	0	1	2	54	60	32	0	2	0	-9	0	1	3.69265	1.1116	12.93	91	0.142088	0	0	3	0	12	6	0	0	0	0
113	2017-08-24	2017-04-27	0	0	1	2	119	58	29.18	1	3	0	0	1	1	3.14731	0.947434	8.86	86.9	0.101956	0	0	3	0	9	2	0	0	0	0
118	2019-07-30	2019-02-06	0	0	1	2	174	75	27.48	0	2	0	1	1	1	2.20163	0.662758	4.6	115	0.04	0	0	3	0	25	3	0	0	0	0
138	2018-08-02	2018-06-18	0	0	1	2	45	66	26.8	0	3	0	1	0	1	2.10769	0.634477	4.31	45	0.0957778	0	0	3	0	21	7	0	0	0	0
140	2019-09-19	2019-08-26	0	0	1	2	24	63	30	0	2	0	1	0	1	2.0072	0.604226	4.02	50	0.0804	0	0	4	0	17	7	0	0	0	0
150	2017-08-10	2017-06-05	0	0	1	2	66	67	24.4	0	2	0	1	1	1	1.90689	0.574031	3.75	34.4	0.109012	0	0	4	0	14	4	0	0	0	0
157	2018-07-20	2018-04-30	0	0	1	2	81	61	22.8	0	2	0	0	0	1	3.83996	1.15594	14.32	40	0.358	0	0	5	0	6	4	0	0	0	0
159	2017-12-14	2017-11-13	0	0	1	2	31	50	34.62	0	2	0	0	0	1	2.64155	0.795185	6.24	65	0.096	0	0	4	0	16	6	0	0	0	0
160	2017-02-20	2017-02-01	0	0	1	2	19	67	30.9	0	2	0	0	1	1	2.40054	0.722634	5.28	102	0.0517647	0	0	4	0	7	3	0	0	0	0
164	2020-01-15	2019-11-29	0	0	1	2	47	49	29.1	0	2	0	1	0	1	1.852	0.557507	3.61	35	0.103143	0	0	3	0	14	6	0	0	0	0
166	2017-05-18	2017-05-05	0	0	1	2	13	47	26.13	0	2	0	1	1	1	3.09424	0.931458	8.54	26.1	0.327203	0	0	3	0	10	0	0	0	0	0
205	2016-09-21	2016-08-31	0	0	1	2	21	72	25.1	0	3	0	1	0	1	1.15056	0.346353	2.22	10.1	0.219802	0	0	4	0	14	0	0	0	0	0
250	2017-05-18	2017-05-05	0	0	1	2	13	47	26.13	0	2	0	1	1	0	3.09424	0.931458	8.54	26.1	0.327203	0	0	3	0	10	0	0	0	0	0
256	2017-12-15	2017-09-25	0	0	1	2	81	69	40.2	0	1	0	0	1	1	2.3978	0.721811	5.27	54	0.0975926	0	0	4	0	6	5	0	0	0	0
257	2017-12-14	2017-11-13	0	0	1	2	31	50	33.7	0	2	0	1	0	1	2.64155	0.795185	6.24	65	0.096	0	0	4	0	16	6	0	0	0	0
269	2017-12-22	2017-12-13	0	0	1	2	9	69	25.7	0	3	0	0	-9	-9	3.12928	0.942008	8.75	103.1	0.0848691	0	0	4	0	15	11	0	0	0	0
294	2017-08-21	2017-08-02	0	0	1	2	19	74	25.88	0	1	0	1	0	0	3.2854	0.989005	9.75	35	0.278571	0	0	4	0	6	4	0	0	0	0
308	2015-12-23	2015-12-08	1	0	0	1	15	72	28.7	0	1	0	1	0	-9	2.20789	0.664642	4.62	71	0.0650704	0	0	3	0	13	3	0	0	0	0
313	2019-08-09	2019-06-24	0	0	1	2	46	51	25.1	0	1	1	1	0	1	3.03034	0.912222	8.17	43.3	0.188684	0	0	4	0	10	3	0	0	0	0
314	2018-08-10	2018-06-07	0	0	1	2	64	57	23	0	1	0	0	0	1	2.79286	0.840733	6.93	60.5	0.114545	0	0	4	0	23	3	0	0	0	0
315	2018-10-30	2018-10-09	0	0	1	2	21	53	27.1	0	1	0	0	0	1	2.42492	0.729974	5.37	43	0.124884	0	0	3	0	18	6	0	0	0	0
316	2019-08-13	2019-01-04	0	0	1	2	221	71	30.47	0	1	0	1	1	0	2.56803	0.773055	5.93	69	0.085942	0	0	4	0	15	4	0	0	0	0
319	2018-08-03	2018-06-24	0	0	1	2	40	73	28.7	0	1	0	0	0	1	2.55336	0.768638	5.87	119.5	0.0491213	0	0	5	0	6	4	0	0	0	0
323	2018-01-17	2017-12-21	0	0	1	2	27	66	24.11	0	1	0	1	0	0	2.488	0.748963	5.61	40	0.14025	0	0	4	0	7	4	0	0	0	0
326	2017-10-30	2017-10-19	0	0	1	2	11	58	25.8	0	1	1	1	0	-9	2.21412	0.666518	4.64	51	0.0909804	0	0	3	0	12	3	0	0	0	0
328	2019-03-15	2019-02-27	0	0	1	2	16	59	23.4	0	1	0	1	-9	-9	-0.599462	-0.180456	0.66	25	0.0264	1	0	4	0	19	7	0	0	0	0
332	2019-08-06	2019-07-18	0	0	1	2	19	68	34.4	0	1	0	1	1	1	2.36737	0.71265	5.16	74.9	0.0688919	0	0	1	0	13	0	0	0	0	0
333	2018-02-09	2017-12-22	0	0	1	2	49	51	25.1	0	1	1	1	0	1	-0.234465	-0.0705811	0.85	17	0.05	1	0	4	0	17	7	0	0	0	0
337	2018-10-05	2018-09-14	0	0	1	2	21	60	26.8	0	1	0	-9	0	1	3.6792	1.10755	12.81	34	0.376765	1	0	3	0	15	4	0	0	0	0
338	2019-03-15	2019-02-21	0	0	1	2	22	62	25.9	0	1	1	1	0	1	2.96717	0.893207	7.82	53.3	0.146717	0	0	3	0	17	4	0	0	0	0
339	2017-12-08	2017-11-16	0	0	1	2	22	51	28.9	1	1	0	0	0	1	4.01614	1.20898	16.18	67	0.241493	0	0	1	0	12	0	0	0	0	0
342	2019-06-20	2019-01-27	0	0	1	2	144	51	24	0	1	0	1	0	1	-0.268817	-0.0809219	0.83	32	0.0259375	1	0	3	0	16	8	0	0	0	0
344	2018-12-17	2018-11-27	0	0	1	2	20	62	25.25	0	1	0	0	0	1	1.76553	0.531479	3.4	72.3	0.0470263	0	0	4	0	12	3	0	0	0	0
345	2018-12-17	2018-04-13	0	0	1	2	248	71	33.15	0	1	0	1	1	0	2.32769	0.700704	5.02	65	0.0772308	0	0	4	0	10	6	0	0	0	0
348	2017-02-20	2017-02-01	0	0	1	2	19	67	30.34	0	1	0	1	1	1	2.40054	0.722634	5.28	102	0.0517647	0	0	4	0	7	3	0	0	0	0
352	2019-06-17	2019-05-02	0	0	1	2	46	66	24.21	0	1	0	1	0	-9	2.12102	0.638489	4.35	88.6	0.0490971	0	0	3	0	24	7	0	0	0	0
353	2019-02-05	2019-01-22	0	0	1	2	14	69	29	0	1	0	0	0	1	3.40327	1.02449	10.58	147	0.0719728	0	0	1	0	19	0	0	0	0	0
354	2018-06-01	2018-04-30	0	0	1	2	32	59	26.35	0	1	0	1	0	1	2.62994	0.791691	6.19	47	0.131702	0	0	4	0	6	4	0	0	0	0
355	2019-12-26	2019-12-09	0	0	1	2	17	81	21.5	0	1	1	0	1	1	3.64039	1.09587	12.47	92	0.135543	0	0	4	0	14	9	0	0	0	0
356	2017-10-04	2017-01-09	0	0	1	2	268	51	21.37	0	1	1	1	0	1	3.33056	1.0026	10.06	27.8	0.361871	0	0	1	0	12	0	0	0	0	0
357	2017-02-06	2017-01-26	0	0	1	2	11	64	29.1	0	1	1	1	1	0	2.89142	0.870404	7.42	45	0.164889	0	0	5	0	6	3	0	0	0	0
359	2020-01-06	2019-08-13	0	0	1	2	146	73	29.38	0	1	0	1	0	1	2.23266	0.672098	4.7	40	0.1175	0	0	3	0	23	3	0	0	0	0
360	2019-12-09	2019-11-11	0	0	1	2	28	61	26.63	0	1	0	1	0	1	2.68032	0.806858	6.41	56	0.114464	0	0	4	0	6	7	0	0	0	0
364	2018-04-12	2018-03-23	0	0	1	2	20	59	24.5	0	1	0	0	-9	1	2.62761	0.790988	6.18	62	0.0996774	0	0	1	0	15	0	0	0	0	0
377	2019-10-01	2019-09-13	0	0	1	2	18	64	26.6	0	1	0	1	0	1	2.37573	0.715167	5.19	77	0.0674026	0	0	1	0	20	6	0	0	0	0
378	2019-02-11	2018-12-21	0	0	1	2	52	70	27.4	0	1	0	1	1	1	2.40054	0.722634	5.28	48.2	0.109544	0	0	4	0	20	6	0	0	0	0
381	2015-09-04	2015-06-30	1	0	0	1	66	55	24.2	0	1	0	1	0	1	2.45943	0.740363	5.5	47	0.117021	0	0	1	0	13	0	0	0	0	0
417	2019-08-28	2019-08-14	0	0	1	2	14	59	22.7	0	1	0	1	0	1	2.33342	0.702431	5.04	35	0.144	0	0	3	0	10	3	0	0	0	0
418	2019-05-31	2019-05-03	0	0	1	2	28	57	27.86	0	1	0	0	1	0	2.51602	0.757396	5.72	60	0.0953333	0	0	4	0	11	5	0	0	0	0
421	2020-12-18	2020-12-13	0	1	0	3	5	68	23.87	0	3	0	1	0	0	1.76977	0.532754	3.41	116.802	0.0291947	1	0	4	0	6	5	0	0	0	0
423	2020-09-28	2020-08-14	0	1	0	3	45	61	30.62	0	3	0	1	0	0	2.16027	0.650308	4.47	62	0.0720968	0	0	4	0	18	2	0	0	0	0
424	2020-06-24	2020-06-11	0	0	1	2	13	64	36.96	1	3	0	1	1	1	4.16189	1.25285	17.9	102	0.17549	0	0	3	0	13	7	0	0	0	0
425	2020-11-18	2020-11-04	0	1	0	3	14	60	25.14	0	3	0	1	1	1	2.46205	0.741152	5.51	66	0.0834848	0	0	3	0	12	0	0	0	0	0
426	2020-09-17	2020-09-01	0	1	0	3	16	45	30.81	0	3	0	0	0	1	1.37851	0.414973	2.6	34	0.0764706	0	0	5	0	23	3	0	0	0	0
430	2020-11-03	2020-10-13	0	1	0	3	21	57	43.17	0	3	0	0	1	0	1.91456	0.576341	3.77	74.9	0.0503338	0	0	3	0	20	3	0	0	0	0
431	2021-01-06	2020-07-07	0	0	1	2	183	60	25.11	0	3	0	1	0	1	2.30159	0.692847	4.93	57	0.0864912	0	0	1	0	16	0	0	0	0	0
432	2020-11-25	2020-10-03	0	1	0	3	53	58	26.3	0	3	0	0	0	1	0.925999	0.278754	1.9	46.2	0.0411255	0	0	1	0	20	0	0	0	0	0
434	2018-07-20	2018-02-14	0	0	1	2	156	77	28.68	0	3	0	1	0	1	3.10098	0.933487	8.58	92	0.0932609	0	0	3	0	10	4	0	0	0	0
435	2020-01-09	2019-12-30	0	0	1	2	10	56	25.8	0	3	0	1	-9	-9	2.488	0.748963	5.61	71	0.0790141	0	0	4	0	15	5	0	0	0	0
436	2020-01-06	2019-06-13	0	0	1	2	207	72	31.64	0	3	0	1	0	1	1.96347	0.591065	3.9	56	0.0696429	0	1	3	0	12	3	0	0	0	0
439	2020-01-13	2019-12-10	0	0	1	2	34	68	25.61	0	3	0	1	1	1	2.05658	0.619093	4.16	46	0.0904348	0	0	3	0	12	3	0	0	0	0
440	2019-10-08	2019-09-06	0	0	1	2	32	65	30.59	0	3	0	-9	1	1	2.40054	0.722634	5.28	98.9	0.0533873	0	0	3	0	12	2	0	0	0	0
441	2020-01-09	2019-12-21	0	0	1	2	19	62	27.4	0	3	0	1	-9	-9	2.09085	0.62941	4.26	62	0.0687097	0	0	3	0	12	3	0	0	0	0
442	2017-05-26	2017-05-09	0	0	1	2	17	61	30.3	0	3	0	1	0	1	2.68706	0.808886	6.44	83	0.0775904	0	0	4	0	12	3	0	0	0	0
18	2017-02-22	2017-01-26	0	0	1	2	27	62	30.4	0	2	0	1	0	1	2.51096	0.755875	5.7	34.5	0.165217	0	0	1	0	8	0	0	0	0	0
85	2019-03-28	2019-01-31	0	0	1	2	56	74	23.65	0	3	0	1	1	0	2.43029	0.731589	5.39	104	0.0518269	0	0	1	0	14	0	0	0	0	0
86	2017-07-21	2017-03-23	0	0	1	2	120	54	39.03	0	3	0	1	0	1	2.06695	0.622214	4.19	116.7	0.035904	0	0	1	0	22	0	0	0	0	0
92	2019-10-11	2018-11-10	0	0	1	2	335	71	32.3	0	3	1	1	1	1	2.29866	0.691965	4.92	55	0.0894545	0	0	1	0	15	0	0	0	0	0
110	2016-03-17	2016-02-05	0	0	1	2	41	60	27.1	0	2	0	1	0	1	2.01792	0.607455	4.05	58	0.0698276	0	0	1	0	13	0	0	0	0	0
116	2018-12-19	2018-12-12	0	0	1	2	7	52	27.37	0	3	0	1	0	0	2.43563	0.733197	5.41	69	0.0784058	0	0	1	0	15	0	0	0	0	0
121	2016-12-01	2016-11-12	0	0	1	2	19	67	25	0	2	0	0	0	0	2.99458	0.901458	7.97	108	0.0737963	0	0	1	0	12	0	0	0	0	0
127	2017-02-22	2017-01-25	0	0	1	2	28	61	33.36	0	2	0	1	0	1	2.7845	0.838219	6.89	52	0.1325	0	0	1	0	12	0	0	0	0	0
143	2014-10-08	2014-08-07	1	0	0	1	62	59	42.7	0	2	0	1	1	1	1.5509	0.466868	2.93	27	0.108519	0	0	1	0	10	0	0	0	0	0
144	2019-04-19	2019-03-29	0	0	1	2	21	68	28.4	0	2	0	1	0	1	1.9855	0.597695	3.96	59	0.0671186	0	0	1	0	18	0	0	0	0	0
165	2017-02-12	2017-01-25	0	0	1	2	18	62	33.36	0	2	0	1	0	1	2.7845	0.838219	6.89	52	0.1325	0	0	1	0	12	0	0	0	0	0
177	2016-08-30	2015-06-08	1	0	0	1	449	71	28	0	2	0	1	-9	-9	3.01257	0.906874	8.07	104	0.0775962	0	0	1	0	26	0	0	0	0	0
309	2018-04-12	2018-03-23	0	0	1	2	20	59	24.22	0	1	0	1	0	1	2.62761	0.790988	6.18	62	0.0996774	0	0	1	0	15	0	0	0	0	0
317	2019-07-29	2018-10-09	0	0	1	2	293	51	24.4	0	1	0	0	0	0	2.03562	0.612784	4.1	38	0.107895	0	0	1	0	12	0	0	0	0	0
318	2019-11-19	2019-03-21	0	0	1	2	243	64	26.1	0	1	0	1	0	1	2.21723	0.667453	4.65	62	0.075	1	0	1	0	15	0	0	0	0	0
324	2018-12-03	2018-01-15	0	0	1	2	322	54	24.69	0	1	0	1	0	1	2.51854	0.758155	5.73	38	0.150789	0	0	1	0	12	0	0	0	0	0

## Sheet: Legend
Study_ID	Patient study ID
Date_of_Biopsy	Date that patient received prostate biopsy
MRI_date	Date that patient received prostate multiparemetric MRI
PIRADSv1	1 = patient used PIRADS version 1; 0 = patient did NOT use PIRADS version 1
PIRADSv2.1	1 = patient used PIRADS version 2.1; 0 = patient did NOT use PIRADS version 2.1
PIRADSv2.0	1 = patient used PIRADS version 2.0; 0 = patient did NOT use PIRADS version 2.0
PIRADS_V_1_2_3	1 = patient used PIRADS version 1; 2 = patient used PIRADS version. 2.0; 3 = patient used PIRADS version 2.1
MRI_Biopsy_Difference_Days	Number of days inbetween prostate biopsy and prostate multiparemetric MRI
Age_at_Biopsy	Numberical patient age at time of prostate biopsy
BMI	BMI
Finasteride_Use	1 = patient used Finasteride; 0 = patient did NOT use Frinasteride
White1_Black2_Hispanic3	1 = White patient; 2 = Black patient; 3 = Hispanic patient
PCA_FH	1 = positive family history of Prostate cancer; 0 = negative family history of prostate cancer
Married	1 = patient is married at time of biopsy; 0 = patient is NOT married at time of biopsy
Ever_Smoked	1 = patient has smoked; 0 = patient has not smoked
Current_Alcohol	1 = patient currently drinks alcohol; 0 = patient does not currently drink alcohol
LOG_2_PSA	log base 2 of the PSA
LOG_10_PSA	log base 10 of the PSA
PSA	patient index PSA
MRI_Prostate_Volume	volume in cm cubed of the prostate found on index prostate MRI
PSA Density	PSA / prostate volume
Abnormal_DRE	1 = patient had abnormal DRE; 0 = patient did NOT have abnormal DRE
Overall_GGG	Overall gleason grade group found on prostate biopsy
Highest_PIRADS_OVERALL	Highest PIRADS score on multiparametric MRI
cs_Overall	1 = patient has clinically significant prostate cancer (gleason grade group 2-5); 0 = patient does NOT has clinically significant prostate cancer (gleason grade group 2-5)
Number_of_cores_systematic	Number of cores taken from systematic biopsy
Number_of_cores_targets	Number of prostate biopsy cores take from targets
Number_cores_+_GG2-5_from_Systematic	Number of prostate biopsy cores from systematic cores that had GG 2-5 Pca
Number_of_cores_+_GG2-5_in_Targets	Number of prostate biopsy cores from target cores that had GG 2-5 Pca
Maximum_cancer_length_in_Systematic_cm	Maximum length of cancer from systematic cores in cm
Maximum_cancer_length_in_Target_cm	Maximum length of cancer from target cores in cm
-9	patient data missing
